# Supplementary material
Source: Springer Nature journal article supplement (https://www.springermedizin.de/resource/supplementary/12874_2010_638_MOESM7_ESM.pdf/9432302)

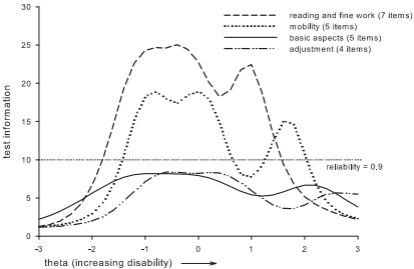

Supplement: MOESM7 [file 9432302]
